# Supplementary material
Source: publisher figshare collection journal article supplement (https://frontiersin.figshare.com/ndownloader/files/12303353)
Supplement: Supplementary file [file 12303353]

## SUPPLEMENTARY FIGURE S3

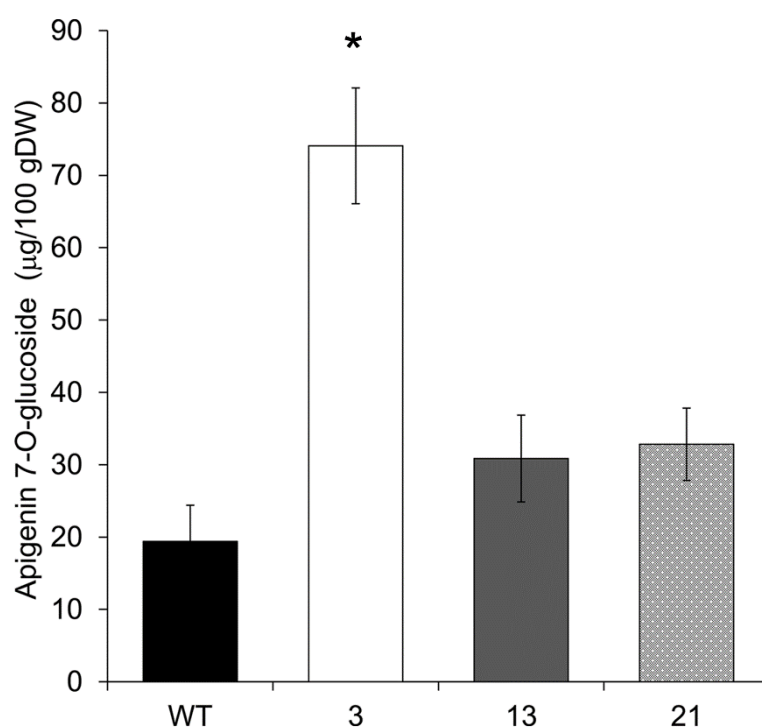

**SUPPLEMENTARY FIGURE S3. HPLC analyses of Apigenin7-O-glucoside in leaves of tobacco plants overexpressing CcMYB12 protein.** Leaves from wild type (WT) and T3 transgenic tobacco lines 3, 13 and 21 were tested. Error bars indicate the SD of the average of apigenin 7-O-glucoside determined as triplicates in three independent biological replicates. Asterisks indicate a statistical difference (\*p-value < 0.05) between the means for WT and for tested transgenic samples, according to Student's t-test. DW, dry weight.
